# Supplementary material for: Facile synthesis of an all-in-one graphene nanosheets@nickel electrode for high-power performance supercapacitor application
Source: Royal Society of Chemistry journal article supplement (doi:10.1039/c8ra06531d), 2018-01-01
Supplement: c8ra06531d1.pdf [file c8ra06531d1.pdf]

**Facile synthesis of all-in-one graphene nanosheets@nickel electrode for high-power performance supercapacitor application**

Bing Huang<sup>a,\*</sup>, Zhiyuan Zhao<sup>a,\*</sup>, Jian Chen<sup>a</sup>, Yuzhen Sun<sup>a</sup>, Xiaowei Yang<sup>a</sup>, Jian Wang<sup>a,b</sup>, Hao Shen<sup>b</sup>, Ye Jin<sup>b</sup>

<sup>a</sup> *Institute of New Energy on Chemical Storage and Power Sources, College of Applied Chemistry and Environmental Engineering, Yancheng Teachers University, Yancheng, 224000, China*

<sup>b</sup> *College of Chemistry and Chemical Engineering, Nanjing Tech University, Nanjing, 210009, China*

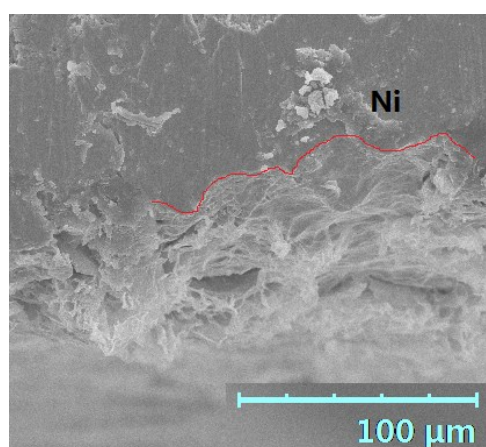

Figure S1. SEM images of electrochemical exfoliated GNSs@Ni electrode

$$C_m(F g^{-1}) = \frac{tIm}{\Delta V}$$

where  $t$  (h) is the discharge time,  $m$  (kg) is the mass of the active materials in the electrodes,  $\Delta V$  (V) is the range of potential,  $I$  (A) is the discharge current.

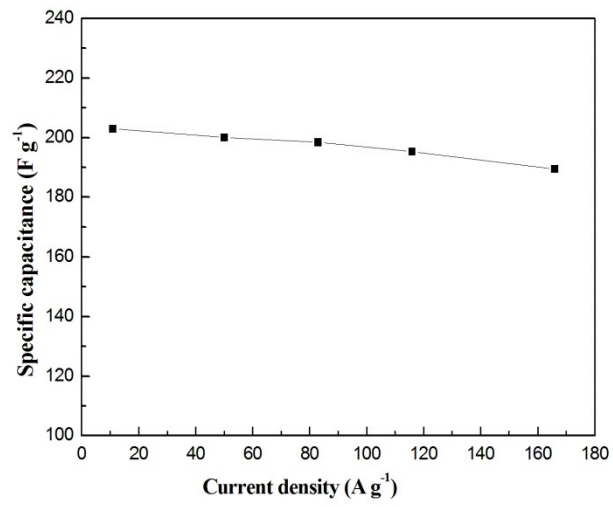

Figure S2, The typical mass capacitance ( $C_m$ ) based on the Galvanostatic Charge-Discharge (GCD) curves were recorded at different current density,  $C_m$  of the electrode can be calculated through the following Eqs .(1) .
